# Supplementary material for: A multi-scale modeling and simulation study to investigate the effect of roughness of a surface on its self-cleaning performance
Source: Royal Society of Chemistry journal article supplement (doi:10.1039/d0me00068j), 2020-01-01
Supplement: d0me00068j2.pdf [file d0me00068j2.pdf]

**A multi-scale modeling and simulation study to investigate the effect of roughness of a surface on its self-clean performance**

Sushanta K. Sethi<sup>1</sup>, Manjinder Singh<sup>1</sup>, Gaurav Manik<sup>1\*</sup>

<sup>1</sup>Dept. of Polymer and Process Engineering, IIT Roorkee Saharanpur Campus, Saharanpur (UP), INDIA

First author mail id: [ssethi@pe.iitr.ac.in](mailto:ssethi@pe.iitr.ac.in)

\*Corresponding author mail id: [manikfpt@iitr.ac.in](mailto:manikfpt@iitr.ac.in)

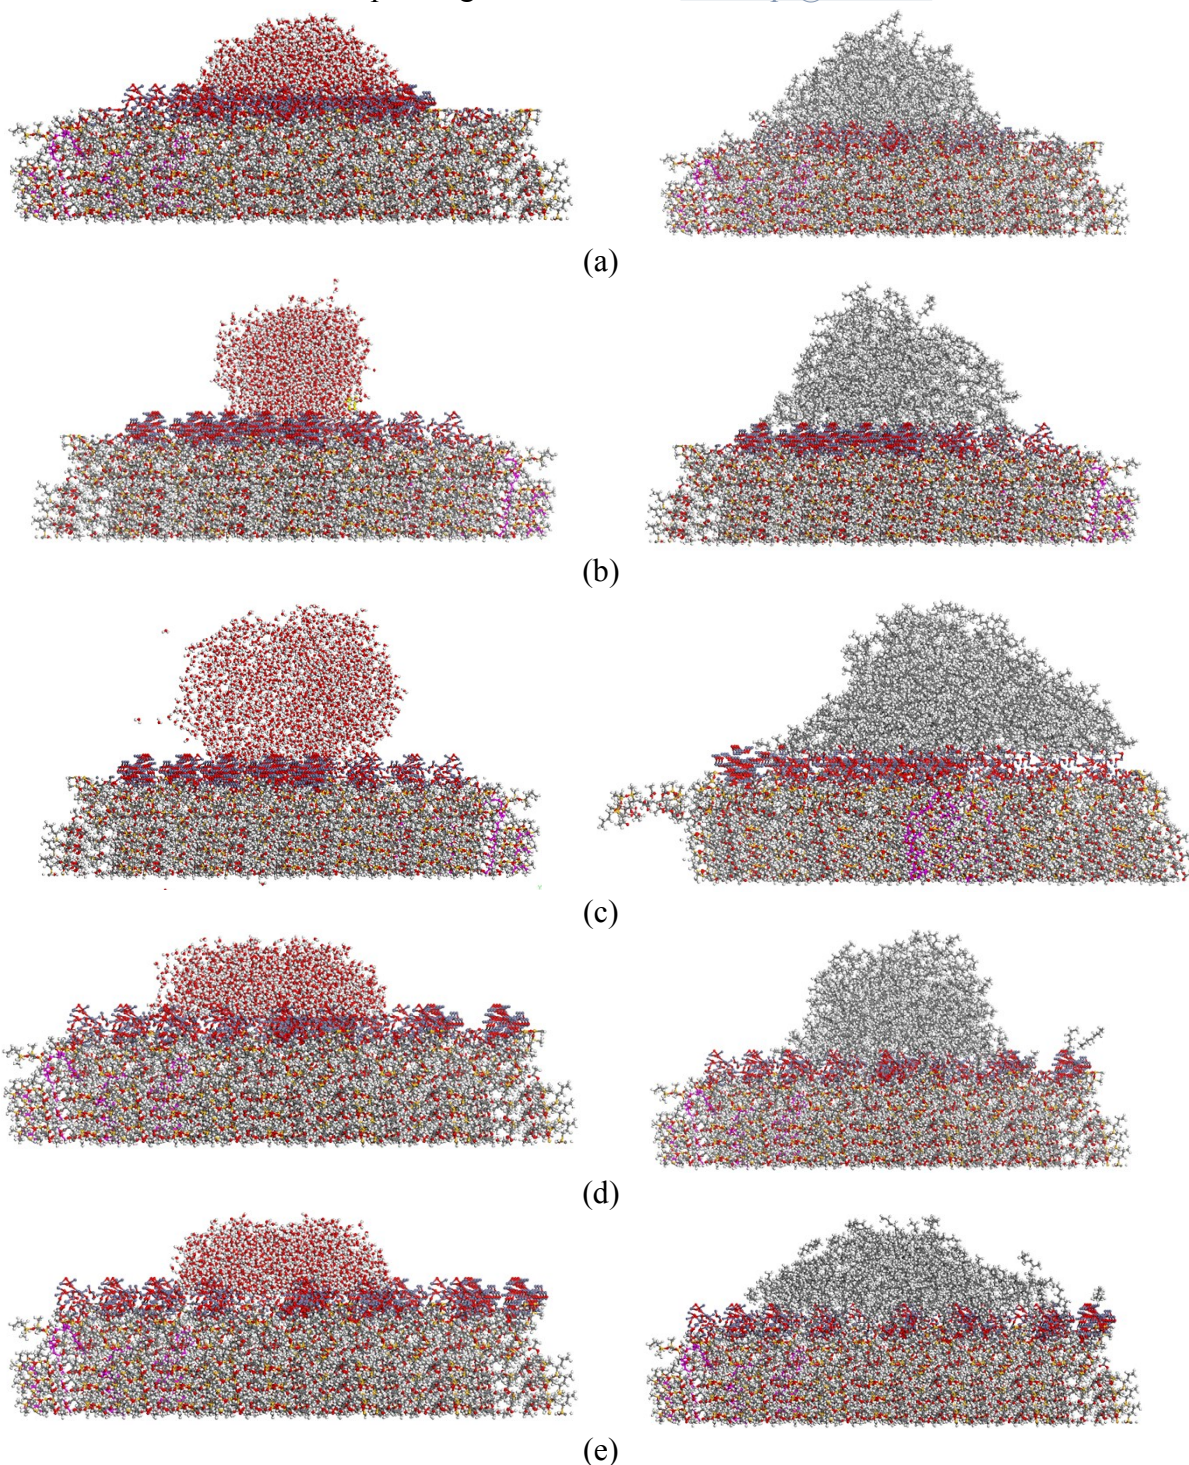

**Figure S1:** Illustration of atomistic water and oil droplet profiles of BM-5Zn at different filler interspacing gap of (a) 7 Å (b) 9 Å (c) 11 Å (d) 13 Å and (e) 15 Å.

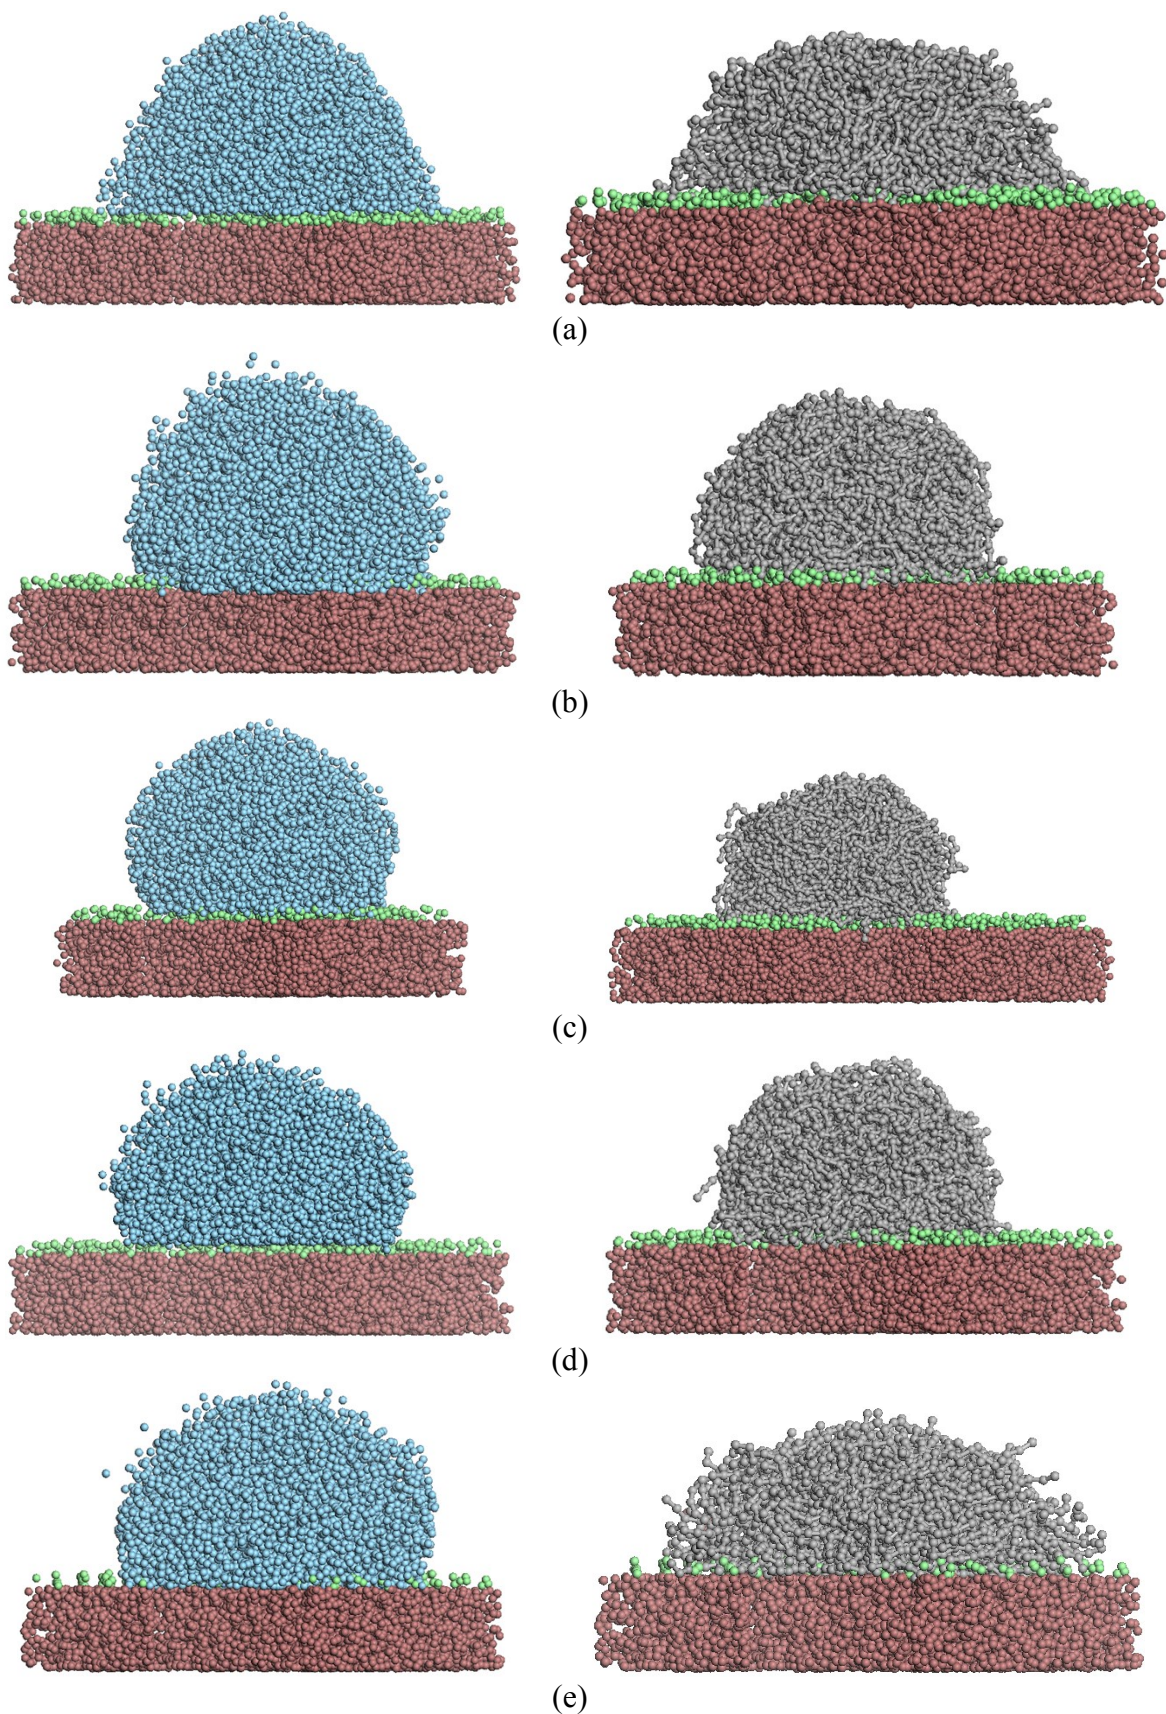

**Figure S2:** Illustration of mesoscopic water and oil droplet profiles of BM-5Zn at different filler interspacing gap of (a) 7 Å (b) 9 Å (c) 11 Å (d) 13 Å and (e) 15 Å.

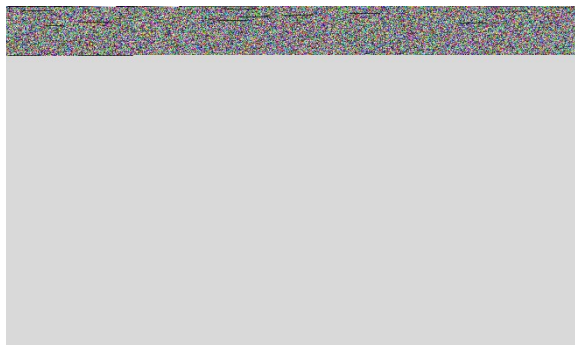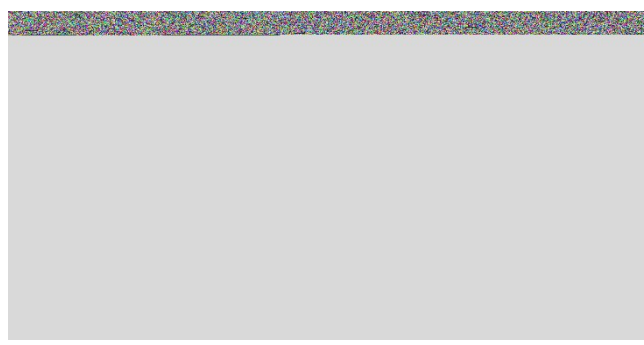

(a)

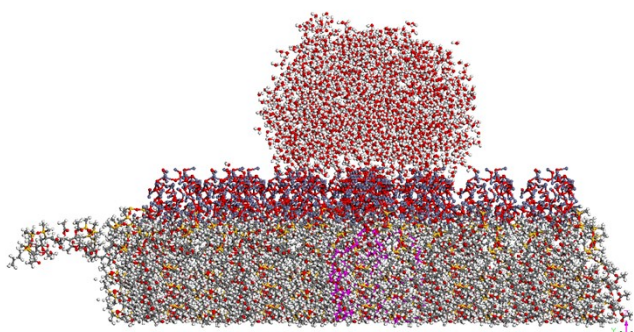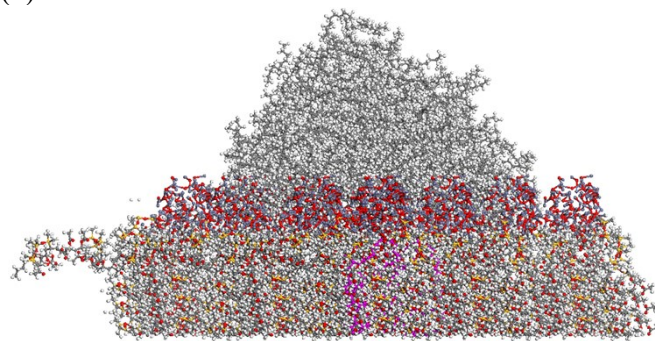

(b)

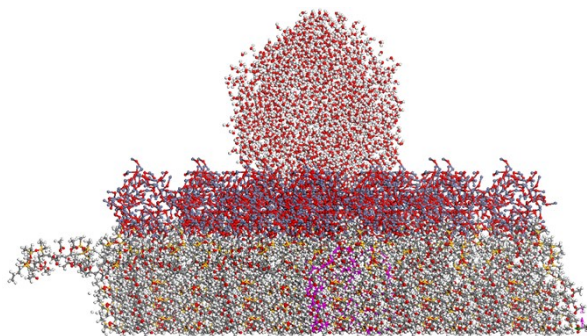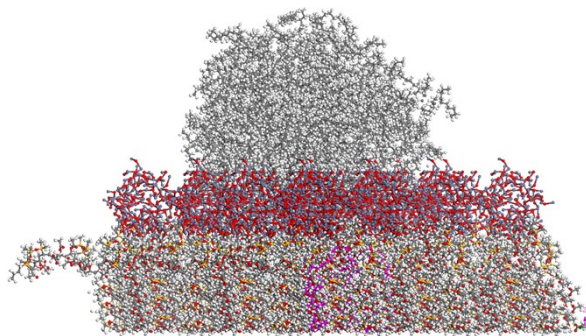

(c)

**Figure S3:** Illustration of atomistic water and oil droplet profiles of (a) BM-5Zn (b) BM-10Zn and (c) BM-15Zn coating surface.

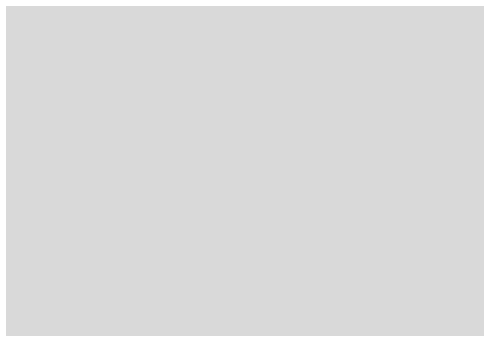

(a)

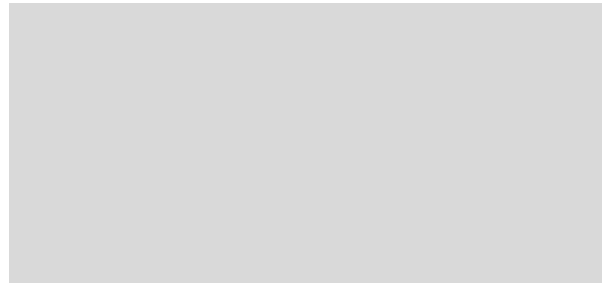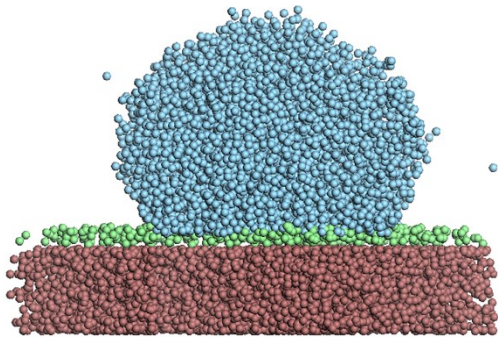

(b)

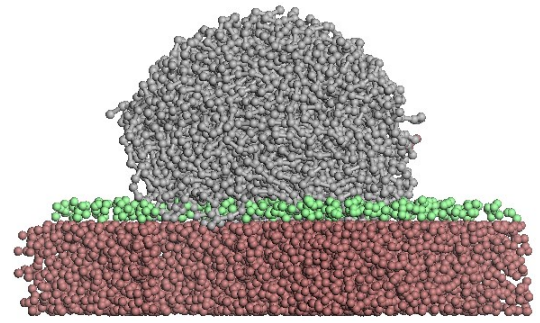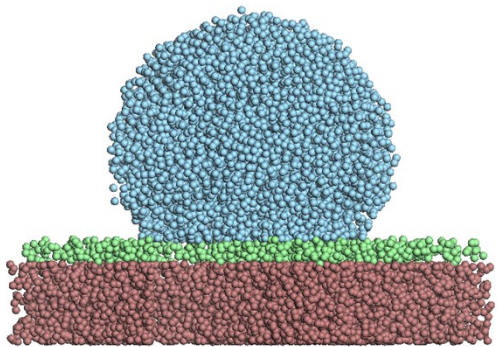

(c)

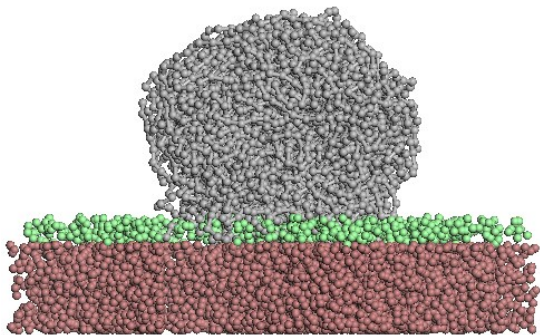

**Figure S4:** Illustration of mesoscopic water and oil droplet profiles of (a) BM-5Zn (b) BM-10Zn and (c) BM-15Zn coating surface.
